# Supplementary material for: High-entropy-assisted platinum single atoms for photothermal green syngas production with high CO2 utilization efficiency
Source: Royal Society of Chemistry journal article supplement (doi:10.1039/d5qi00274e), 2025-01-01
Supplement: d5qi00274e1.pdf [file d5qi00274e1.pdf]

## **High entropy assisted platinum single atoms for photothermal green syngas production with high CO<sub>2</sub> utilization efficiency**

Xin Liu<sup>1, 6</sup>, Senyan Huang<sup>1, 6</sup>, Dachao Yuan<sup>1, 2, 6</sup>, Shan Li<sup>3</sup>, Lin Ma<sup>1</sup>, Linjie Gao<sup>1\*</sup>,

Zhaoqi Li<sup>1</sup>, Yachuan Wang<sup>1</sup>, Yaguang Li<sup>1, 2\*</sup>, Jinhua Ye<sup>1, 4, 5</sup>

## Experimental Section

### Chemicals

Cerium nitrate ( $\text{Ce}(\text{NO}_3)_3 \cdot 6\text{H}_2\text{O}$ ) was purchased from Kermel Co., Ltd. Polyvinylpyrrolidone(PVP), yttrium nitrate ( $\text{Y}(\text{NO}_3)_3 \cdot 6\text{H}_2\text{O}$ ), lanthanum nitrate ( $\text{La}(\text{NO}_3)_3 \cdot 6\text{H}_2\text{O}$ ), scandium nitrate hydrate ( $\text{Sc}(\text{NO}_3)_3 \cdot \text{H}_2\text{O}$ ), zirconium nitrate ( $\text{Zr}(\text{NO}_3)_4 \cdot 5\text{H}_2\text{O}$ ) were purchased from Macklin Co., Ltd. Chloroplatinic acid hexahydrate solution ( $\text{H}_2\text{PtCl}_6 \cdot 6\text{H}_2\text{O}$ ) (1g/20ml), chloropalladated ammonium chloride( $(\text{NH}_4)_2\text{PdCl}_6$ ), hexaammineruthenium trichloride ( $\text{Ru}(\text{NH}_3)_6\text{Cl}_3$ ) were purchased from Shanghai Aladdin Biochemical Technology Co., Ltd. The chemicals were all used without any further treatment.

### Synthesis of $\text{CeYLaScZrO}_x$

4 g PVP was dissolved in 20 ml  $\text{H}_2\text{O}$ . Then, 0.4503 g of  $\text{Ce}(\text{NO}_3)_3 \cdot 6\text{H}_2\text{O}$ , 0.3972 g of  $\text{Y}(\text{NO}_3)_3 \cdot 6\text{H}_2\text{O}$ , 0.4491 g of  $\text{La}(\text{NO}_3)_3 \cdot 6\text{H}_2\text{O}$ , 0.2582 g of  $\text{Sc}(\text{NO}_3)_3 \cdot \text{H}_2\text{O}$  and 0.4452 g of  $\text{Zr}(\text{NO}_3)_4 \cdot 5\text{H}_2\text{O}$  were added. The weight ratio of PVP/metal salts was 2. The solution was stirred for 1 hour and then dropped into liquid nitrogen to rapidly freeze to ice and lyophilized for 48 hours to remove  $\text{H}_2\text{O}$ . The dried sample was calcined in a muffle furnace for 6 hours at 700 °C (heating rate 1 °C per minute).

### Synthesis of $\text{Pt@CeYLaScZrO}_x$

1 g of a prepared  $\text{CeYLaScZrO}_x$  catalyst was added to 15 ml of deionized water and stirred. After stirring for 30 minutes 0.8 ml of  $\text{H}_2\text{PtCl}_6 \cdot 6\text{H}_2\text{O}$  solution (1 g/20 ml) was added to the solution. After stirring for 4 hours, it was placed on a heated stirring table for stirring and drying. The drying temperature was set at 70 °C. Finally, the dried sample was calcined in a muffle furnace to obtain  $\text{Pt@CeYLaScZrO}_x$  catalyst. The calcination temperature was 700 °C and the rate of increase was 1 °C per minute.

$\text{Pd@CeYLaScZrO}_x$  and  $\text{Ru@CeYLaScZrO}_x$  were synthesized according to the same procedures. The noble metal salts  $(\text{NH}_4)_2\text{PdCl}_6$  and  $\text{Ru}(\text{NH}_3)_6\text{Cl}_3$  were added in grams of 0.0517 g and 0.0459g, respectively.

### Synthesis of $\text{ZrO}_2$ , $\text{CeO}_2$ , $\text{Y}_2\text{O}_3$ , $\text{La}_2\text{O}_3$ , $\text{Sc}_2\text{O}_3$ .

4 g of PVP was dissolved in 20 ml of H<sub>2</sub>O and then 2 g of Zr(NO<sub>3</sub>)<sub>4</sub>·5H<sub>2</sub>O was added. The solution was stirred for 1 hour and then dropped into liquid nitrogen to rapidly freeze to ice and lyophilized for 48 hours to remove H<sub>2</sub>O. The dried sample was calcined in a muffle furnace for 6 hours at 700 °C (heating rate 1 °C per minute).

CeO<sub>2</sub>, Y<sub>2</sub>O<sub>3</sub>, La<sub>2</sub>O<sub>3</sub>, Sc<sub>2</sub>O<sub>3</sub> were prepared in the same steps with the addition of 2 g of Ce(NO<sub>3</sub>)<sub>3</sub>·6H<sub>2</sub>O, Y(NO<sub>3</sub>)<sub>3</sub>·6H<sub>2</sub>O, La(NO<sub>3</sub>)<sub>3</sub>·6H<sub>2</sub>O and Sc(NO<sub>3</sub>)<sub>3</sub>·H<sub>2</sub>O, respectively.

#### **Synthesis of Pt@ZrO<sub>2</sub>, Pt@CeO<sub>2</sub>, Pt@Y<sub>2</sub>O<sub>3</sub>, Pt@La<sub>2</sub>O<sub>3</sub>, Pt@Sc<sub>2</sub>O<sub>3</sub>.**

1 g of a prepared ZrO<sub>2</sub> catalyst was added to 15 ml of deionized water and stirred. After stirring for 30 minutes 0.8 ml of H<sub>2</sub>PtCl<sub>6</sub>·6H<sub>2</sub>O solution (1 g/20 ml) was added to the solution. After stirring for 4 hours it was placed on a heated stirring table for stirring and drying. The drying temperature was set at 70 °C. Finally, the dried sample was calcined in a muffle furnace to obtain Pt@ZrO<sub>2</sub> catalyst. The calcination temperature was 700 °C and the rate of increase was 1 °C per minute.

Pt@CeO<sub>2</sub>, Pt@Y<sub>2</sub>O<sub>3</sub>, Pt@La<sub>2</sub>O<sub>3</sub>, Pt@Sc<sub>2</sub>O<sub>3</sub> were prepared in the same steps with the addition of 1 g of catalyst, respectively.

#### **The TiC/Cu-based device**

Magnetron sputtering was used to deposit TiC/Cu film on reaction tube. TiC and Cu were used as the targets, and the working gas was Ar, which had 99.99% purity. Before the deposition process, the reaction tube was washed with deionized water, acetone, and ethanol subsequently, and then the glow-discharge was used to clean the reaction tube. The Cu layer and TiC film were orderly deposited on the surface of tube by magnetron sputtering of SP-0707AS. Specific parameters: the power was 4.5 KW, the sputtering pressure was 6×10<sup>-2</sup> Pa, the bias voltage was 150 V, the sputtering temperature was 200 °C, and the sputtering time for Cu layer, TiC film was 16 min and 4 min, respectively. The following glass vacuum layer was provided by Hebei scientist research experimental and equipment trade Co., Ltd. with 1×10<sup>-3</sup> Pa of pressure.

#### **Characterizations**

The TEM images are obtained on a JEOL2100plus transmission electron microscope operating at 200 kV. The samples are prepared by dropping water/ethanol

dispersion of samples onto ultrathin carbon film and immediately evaporating the solvent. The aberration-corrected high-angle annular dark-field scanning TEM (AC-HAADF-STEM) images and STEM-EDX elemental mapping are collected on a JEM-ARM200F transmission electron microscopy working at 200 kV, equipped with a probe spherical aberration corrector. The SEM images are acquired from FEI Nova Nano SEM450 scanning electron microscopes. XRD measurements of the obtained catalyst powders are performed on a Rigaku MiniFlex 600 diffractometer with a Cu-K $\alpha$  X-ray radiation source ( $\lambda = 0.154056$  nm). Typically, 2 mg of powders are placed on an amorphous silica substrate and the XRD patterns are recorded at a scan rate of  $2^\circ \text{ min}^{-1}$ . XPS measurements are performed by a Thermo VG ESCALAB-250 system with Al-K $\alpha$  and Mg-K $\alpha$  source operated at 15 kV. The binding energies are referred to the C 1s peak (284.8 eV) from adventitious carbon. Zennium\_Pro (Zahner, Germany) is an electrochemical workstation. N<sub>2</sub> sorption isotherms are measured at 77 K on a BELSORP MAX G absorption apparatus. Before tests, the samples are pre-activated at 120 °C for 12 h. The pore size distributions were estimated by the DFT method from a N<sub>2</sub> sorption experiment at 77 K. The metal content in our catalysts is determined by an ICP-OES spectrometer (Model Optima 2000, PerkinElmer). A series of solutions for the measurements are prepared by dissolving 20 mg of samples in 4 mL of aqua regia (75 vol.% HCl and 25 vol.% HNO<sub>3</sub>). The solution is left overnight to allow complete dissolution. The resultant solution is diluted to 50 mL with deionized water in a volumetric flask and then analyzed using ICP-OES.

The Pd K-edge, Ru K-edge, Pt L-edge X-ray fine absorption structure data were collected on the beamline at Beijing Synchrotron and Shanghai Synchrotron Radiation Facility. All samples mixed with BN are coating on 3 M tape. A Si (111) crystal monochromator was used to filter the incident beam. We used IFEFFIT software to calibrate the energy scale, correct the background signal and normalize the intensity. In this work, the transmission mode was used to detect the Extended X-ray absorption fine structure of Ni K-edge and Ce L-edge. The spectra are normalized concerning the edge height after subtracting the pre- (-150 eV to -30 eV) and post-edge (50 eV to 800 eV)

backgrounds using Athena software.<sup>1</sup> To extract the EXAFS oscillations, the background was removed in k-space using a five-domain cubic spline.

### **First principle calculations**

We have employed the Vienna Ab Initio Package (VASP)<sup>2, 3</sup> to perform all the density functional theory (DFT) calculations within the generalized gradient approximation (GGA) using the PBE formulation.<sup>4</sup> We have chosen the projected augmented wave (PAW) potentials<sup>5, 6</sup> to describe the ionic cores and take valence electrons into account using a plane wave basis set with a kinetic energy cutoff of 450 eV. Partial occupancies of the Kohn–Sham orbitals were allowed using the Gaussian smearing method and a width of 0.05 eV. The electronic energy was considered self-consistent when the energy change was smaller than  $10^{-5}$  eV. A geometry optimization was considered convergent when the force change was smaller than 0.02 eV/Å. Grimme’s DFT-D3 methodology was used to describe the dispersion interactions.<sup>7</sup>

The equilibrium lattice constant of ZrO<sub>2</sub> unit cell was optimized by using an 11×11×11 Monkhorst-Pack k-point grid for Brillouin zone sampling. We then use it to construct a ZrO<sub>2</sub>(111) surface model (model 1) with  $p(4\times3)$  periodicity in the X and Y directions and three stoichiometric layers in the Z direction by vacuum depth of 15 Å in order to separate the surface slab from its periodic duplicates. This model comprises of 36 Zr and 72 O atoms. Model 2 was built by 8 Ce atoms, 6 La atoms, 6 Sc atoms, 6 Y atoms, 10 Zr atoms and 63 O atoms into fluorite crystal cell. During structural optimizations, a  $1\times2\times1$  Brillouin zone was used for k-point sampling, and the bottom stoichiometric layer was fixed while the rest were allowed to fully relax. For the models of Pt single atoms, three Pt single atoms are bonded on the surface oxygens of Model 1 and Model 2. For the models of Pt clusters, three Pt atoms are stacked into cluster according to a face centered cubic structure on the surface of Model 1 and Model 2.

### **Thermocatalytic RWGS test**

The thermocatalytic activity of catalysts for CO<sub>2</sub> hydrogenation is tested by the fixed-bed reactor (XM190708-007, DALIAN ZHONGJIARUILIN LIQUID TECHNOLOGY CO., LTD) in continuous flow form. 20 mg of catalysts are loaded in

a quartz tube for thermocatalytic RWGS test, the flow of feed gas is the mixture of 60 mL min<sup>-1</sup> of H<sub>2</sub> and 20 mL min<sup>-1</sup> of CO<sub>2</sub>. The reaction products are tested by gas chromatography (GC) 7890A equipped with FID and TCD detectors.

### **Photothermal RWGS**

The photothermal RWGS is tested as follows: 1g of Pt@CEYLASCZTOX is loaded into TiC/Cu based device (0.036 m<sup>2</sup>), and irradiated by a light source (ZSL-4000). In this test, the flow of feed gas is the mixture of 90 mL min<sup>-1</sup> of H<sub>2</sub> and 30 mL min<sup>-1</sup> of CO<sub>2</sub>. The reaction products are tested by gas chromatography (GC) 7890A equipped with FID and TCD detectors.

**Table S1.** CO<sub>2</sub> conversion rate of various catalysts in photothermal RWGS.

| Catalyst                                                    | Light intensity<br>(kW/m <sup>2</sup> ) | CO <sub>2</sub> conversion<br>rate (%) | Refs.     |
|-------------------------------------------------------------|-----------------------------------------|----------------------------------------|-----------|
| Pt@CeYLaScZrO <sub>x</sub>                                  | 3.2                                     | 45.6                                   | This work |
| Ni <sub>1</sub> Ag <sub>0.02</sub> O <sub>1</sub>           | 1                                       | 7.4                                    | 8         |
| Ni@p-SiO <sub>2</sub>                                       | 24                                      | 42                                     | 9         |
| 5%AgK/Fe <sub>3</sub> O <sub>4</sub>                        | 1                                       | 14.9                                   | 10        |
| Fe <sub>3</sub> O <sub>4</sub>                              | 52                                      | 19                                     | 11        |
| CoFe-400                                                    | 52                                      | 12.2                                   | 11        |
| Ru-Mo <sub>2</sub> TiC <sub>2</sub>                         | 38                                      | 2                                      | 12        |
| Ir/Al <sub>2</sub> O <sub>3</sub>                           | None                                    | 14.94                                  | 13        |
| Pd@Nb <sub>2</sub> O <sub>5</sub>                           | 25                                      | 1.1                                    | 14        |
| Rh/In <sub>2</sub> O <sub>3-x</sub> (OH) <sub>y</sub>       | 9                                       | 9.55                                   | 15        |
| CuZnAlCeZr                                                  | 2                                       | 10.15                                  | 16        |
| Co-PS/SiO <sub>2</sub>                                      | 20                                      | 23                                     | 17        |
| BiO <sub>x</sub> -CeO <sub>2</sub>                          | 30                                      | 2.53                                   | 18        |
| black In <sub>2</sub> O <sub>3-x</sub>                      | 23                                      | 19.5                                   | 19        |
| Ni <sub>12</sub> P <sub>5</sub> /SiO <sub>2</sub>           | 23                                      | 1.5                                    | 20        |
| Bi <sub>2</sub> O <sub>3-x</sub>                            | 1.2                                     | 1.6                                    | 21        |
| Ni <sub>12</sub> P <sub>5</sub> @SiO <sub>2</sub>           | 40                                      | 4.3                                    | 22        |
| In <sub>2</sub> O <sub>3-x</sub> (OH) <sub>y</sub> /SiNW    | 20                                      | 0.1                                    | 23        |
| In <sub>2</sub> O <sub>3-x</sub> (OH) <sub>y</sub> nanorods | 8                                       | 0.5                                    | 24        |

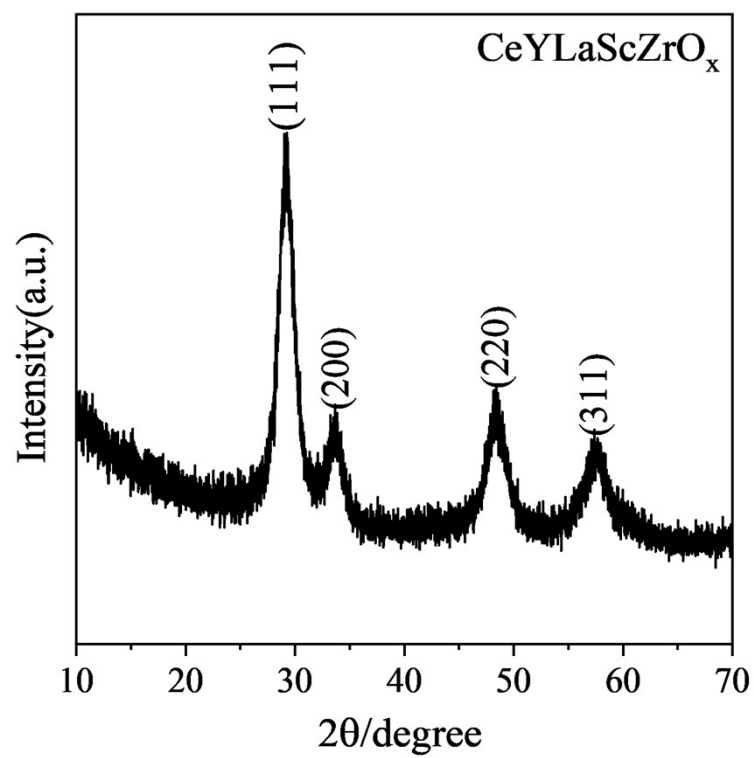

**Fig. S1** XRD pattern of  $\text{CeYLaScZrO}_x$ .



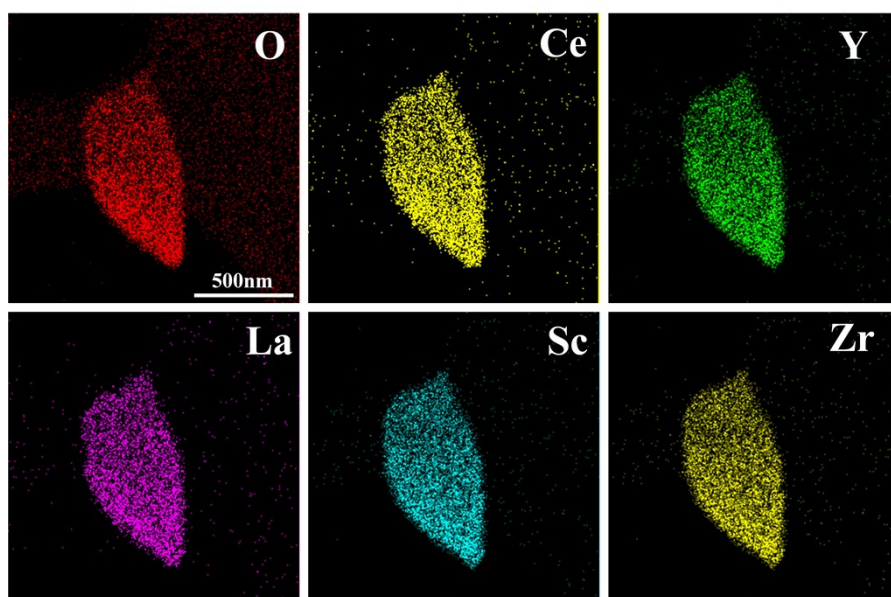

**Fig. S2** O, Ce, Y, La, Sc, Zr elemental mapping images of  $\text{CeYLaScZrO}_x$ .

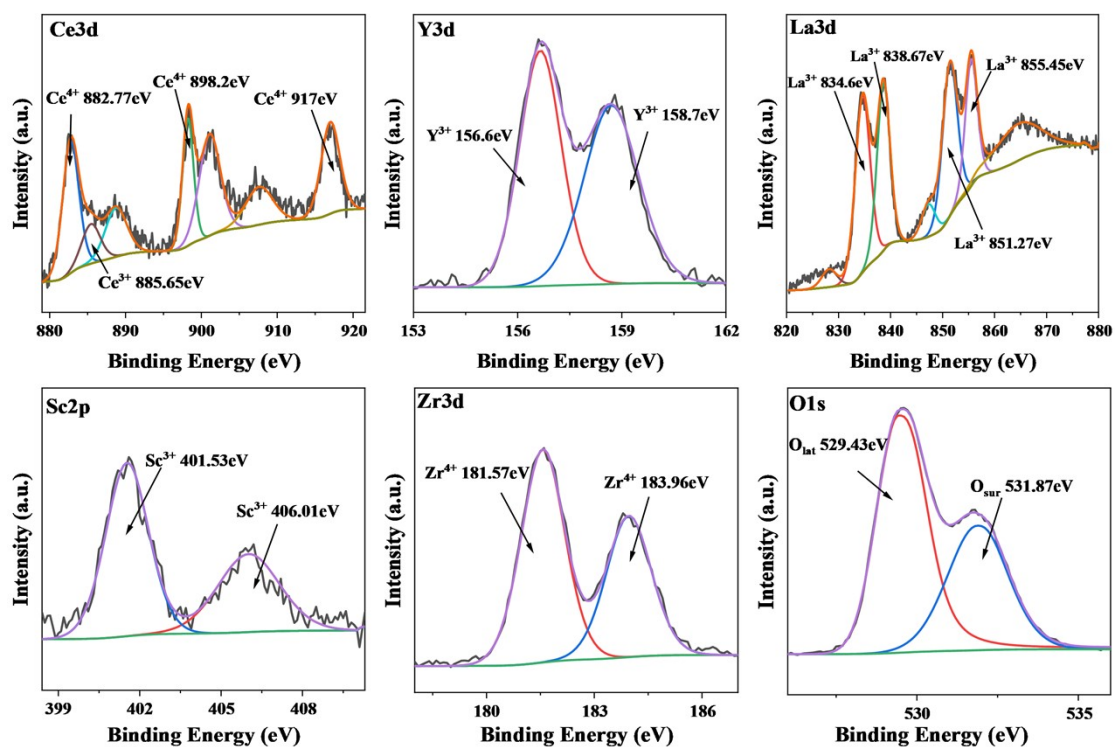

**Fig. S3** Ce3d, Y3d, La3d, Sc2p, Zr3d, O1s XPS spectra of CeYLaScZrO<sub>x</sub>.

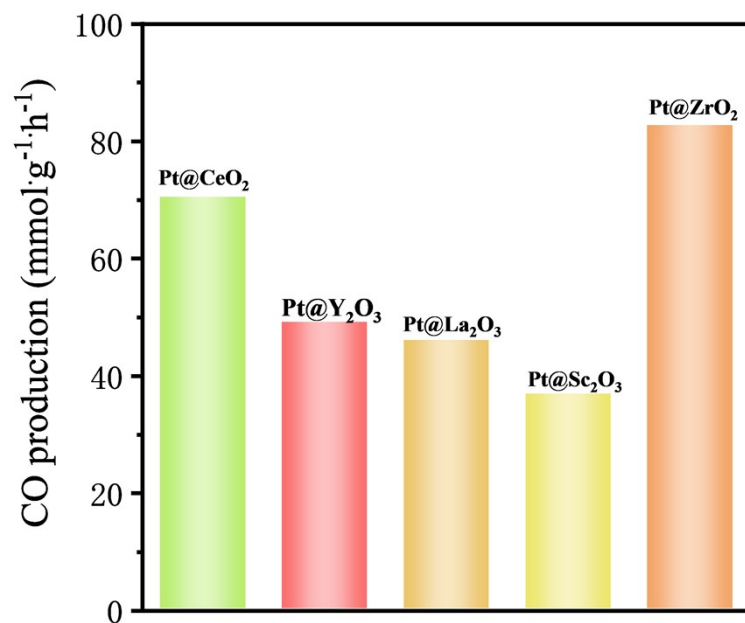

**Fig. S4** CO production for the RWGS reaction at 450 °C over five catalysts. The RWGS test condition is: Catalysts' amount = 20 mg, H<sub>2</sub> flow rate = 60 mL min<sup>-1</sup>, CO<sub>2</sub> flow rate = 20 mL min<sup>-1</sup>, pressure=0.

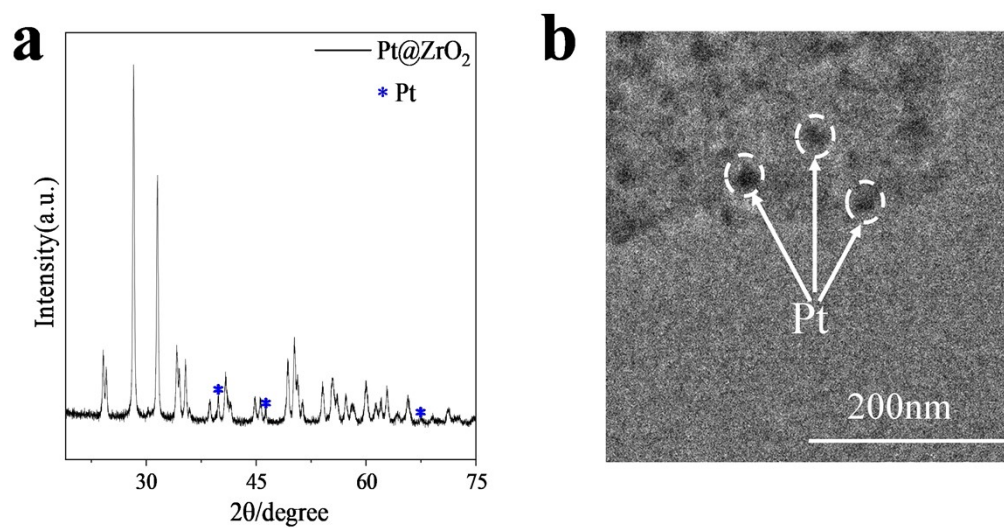

**Fig. S5** (a) XRD pattern and (b) TEM image of Pt@ZrO<sub>2</sub>.

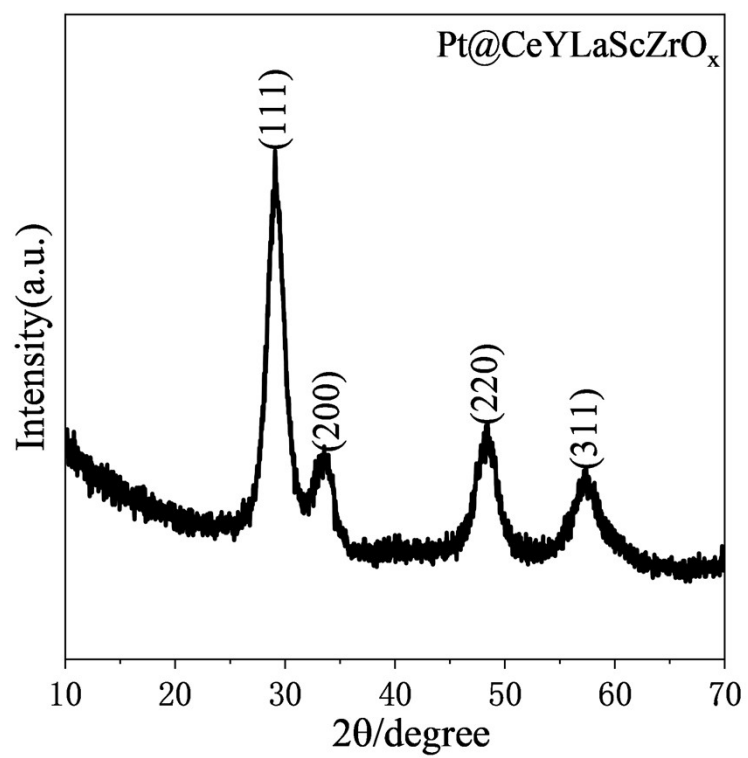

**Fig. S6** XRD pattern of Pt@CeYLaScZrO<sub>x</sub>.

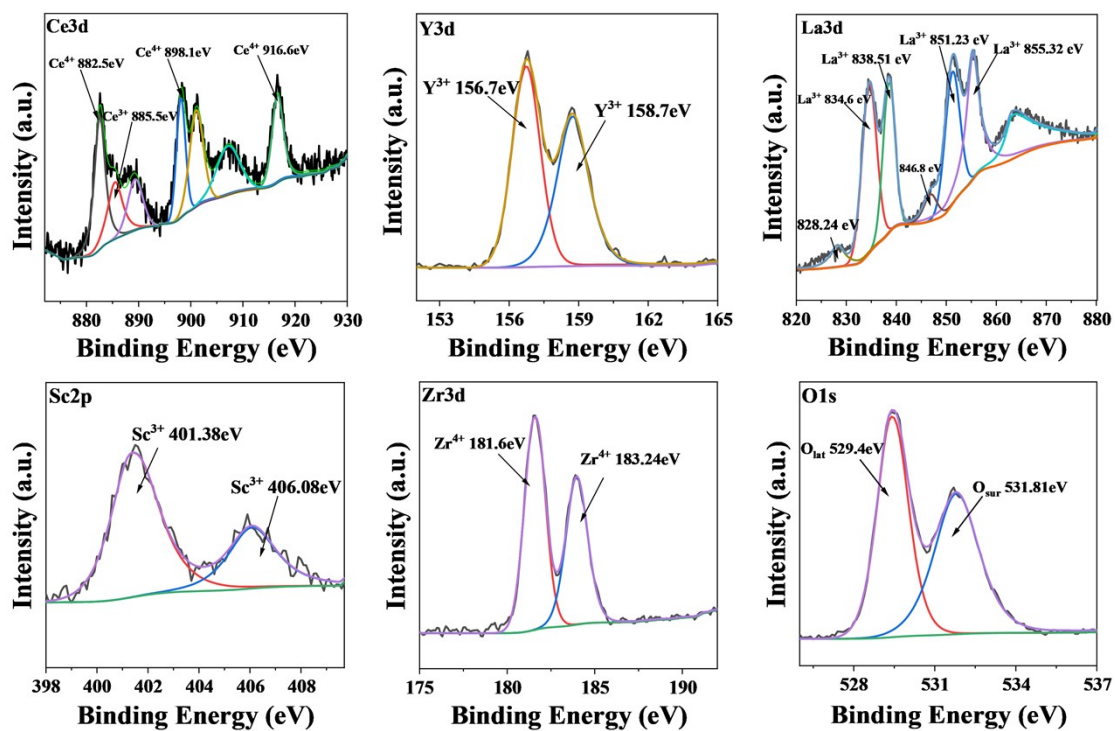

**Fig. S7** Ce3d, Y3d, La3d, Sc2p, Zr3d, O1s XPS spectra of Pt@CeYLaScZrO<sub>x</sub>.

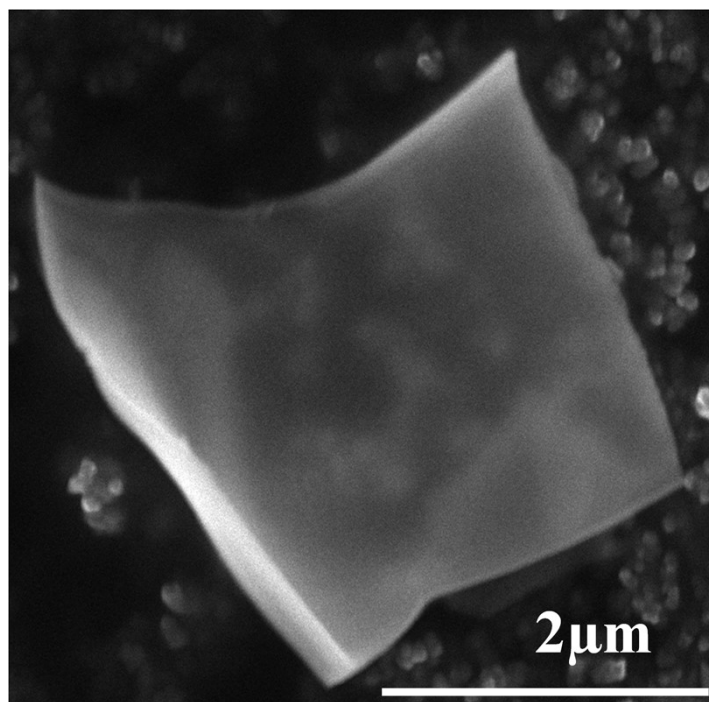

**Fig. S8** SEM image of Pt@CeYLaScZrO<sub>x</sub>.

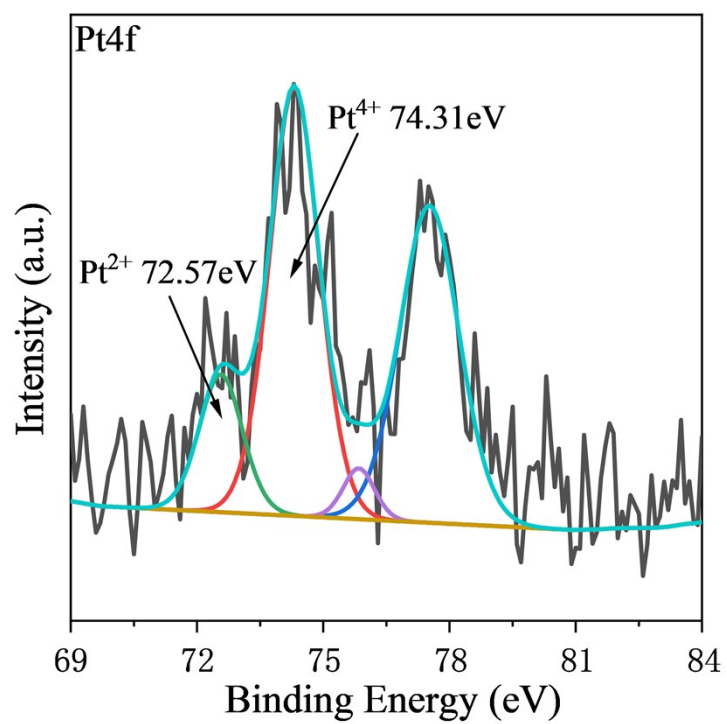

**Fig. S9** Pt 4f XPS spectra of Pt@CeYLaScZrO<sub>x</sub>.



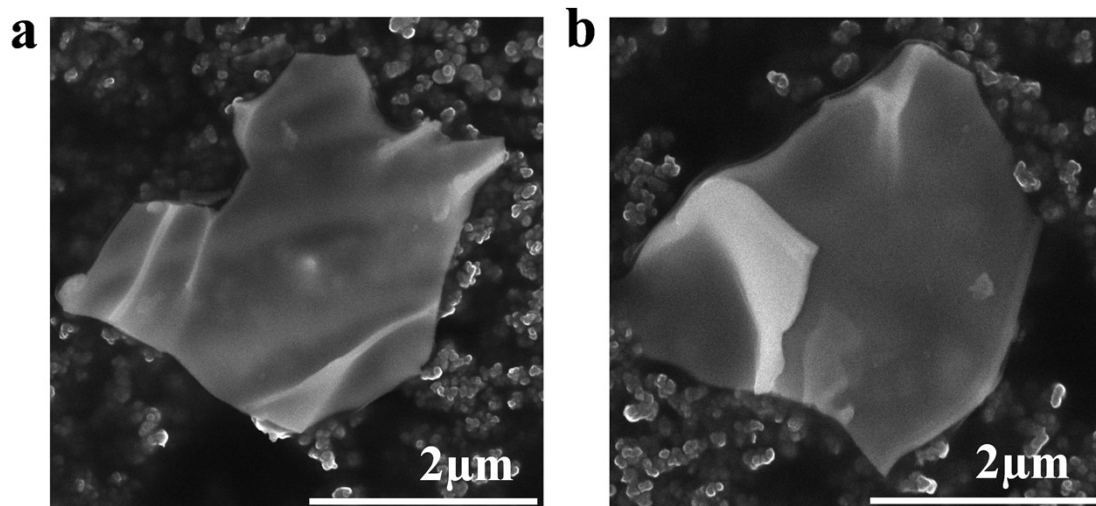

**Fig. S10** SEM images of (a) Pd@CeYLaScZrO<sub>x</sub> and (b) Ru@CeYLaScZrO<sub>x</sub>.

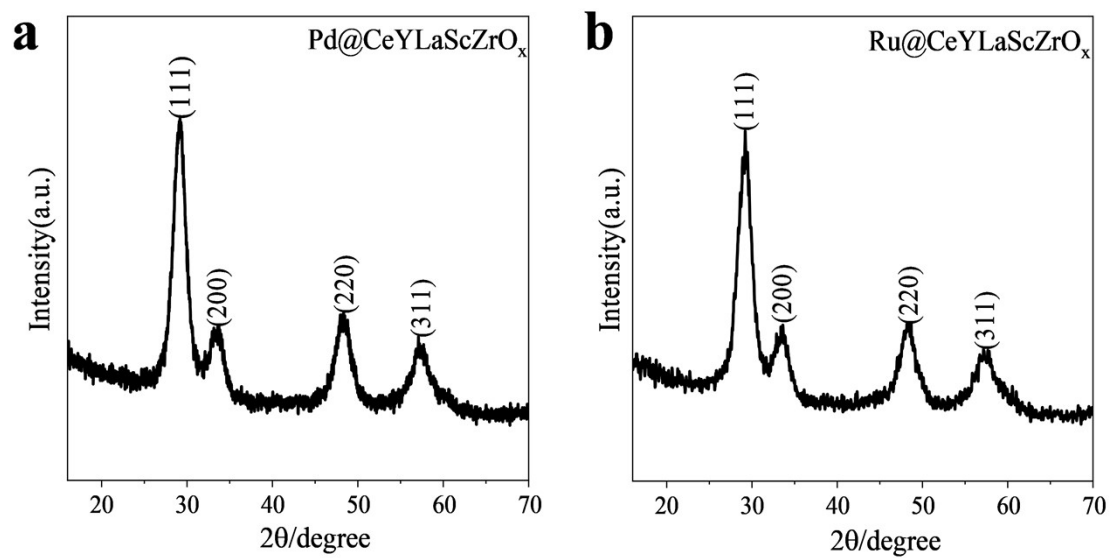

**Fig. S11** XRD patterns of (a) Pd@CeYLaScZrO<sub>x</sub> and (b) Ru@CeYLaScZrO<sub>x</sub>.

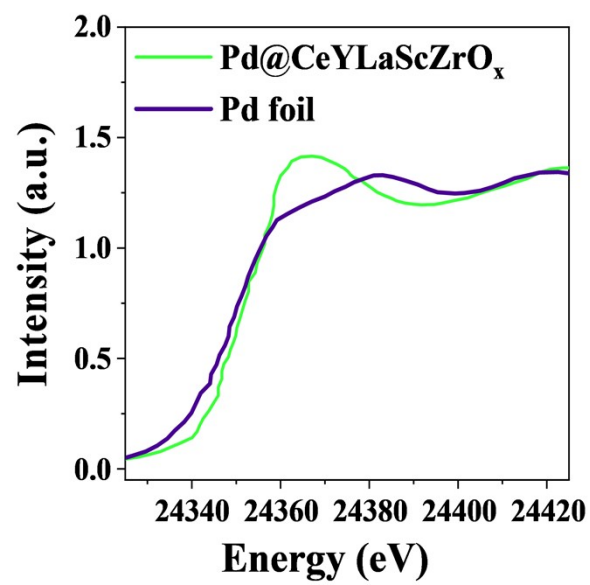

**Fig. S12** XANES spectra at the Pd K-edge for Pd@CeYLaScZrO<sub>x</sub> and metallic Pd foil.

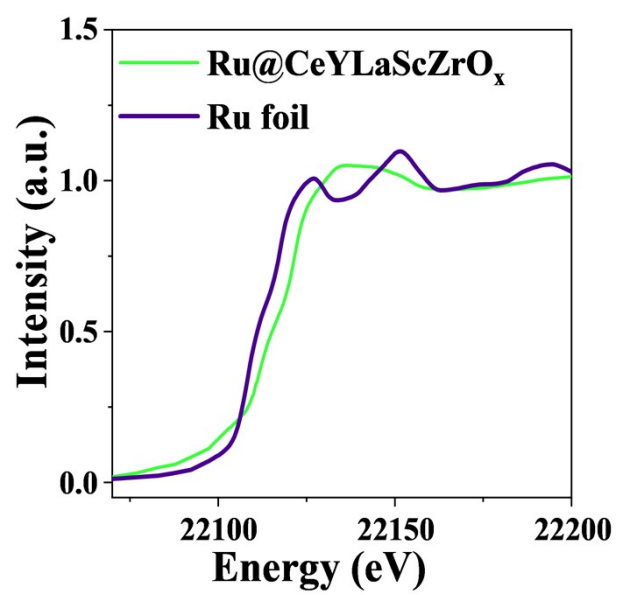

**Fig. S13** XANES spectra at the Ru K-edge for Ru@CeYLaScZrO<sub>x</sub> and metallic Ru foil.

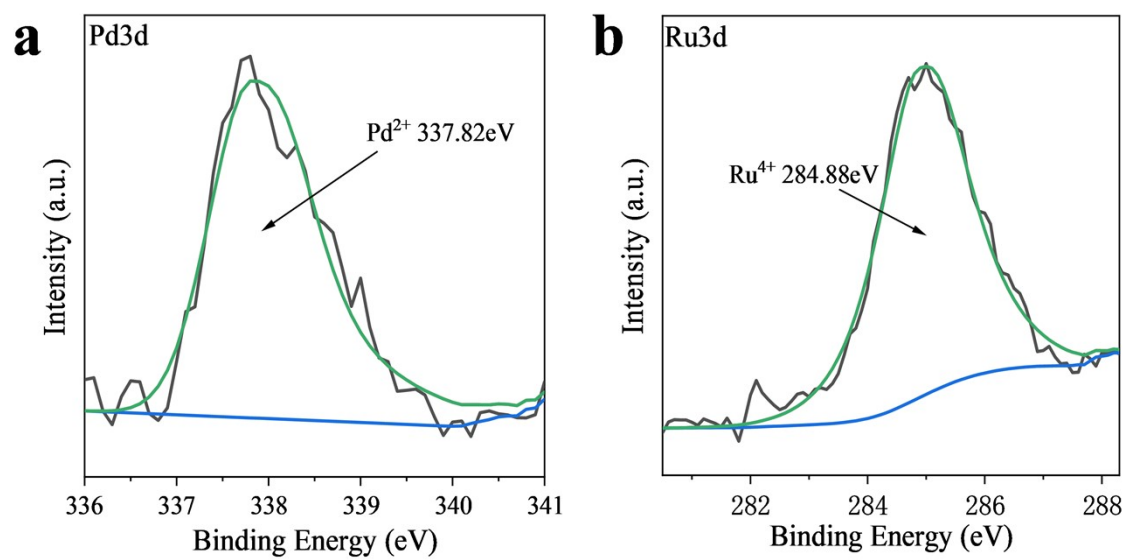

**Fig. S14** (a) Pd 3d XPS spectra of Pd@CeYLaScZrO<sub>x</sub>, (b) Ru 3d XPS spectra of Ru@CeYLaScZrO<sub>x</sub>.

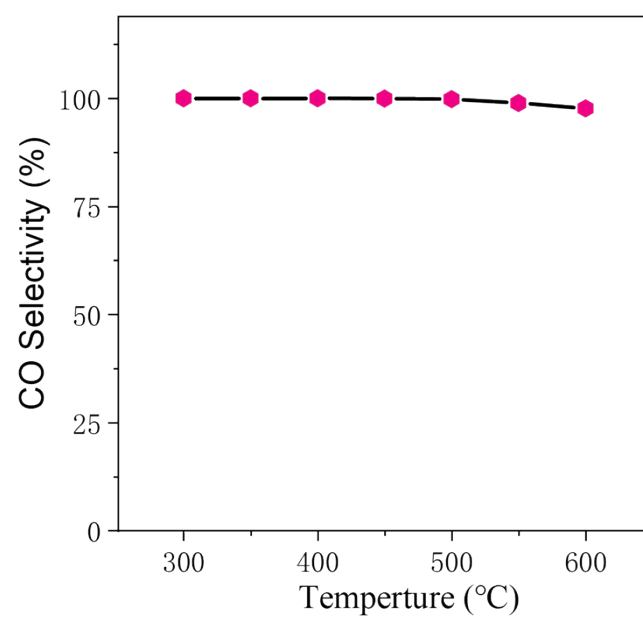

**Fig. S15** CO selectivity of thermocatalytic RWGS over Pt@CeYLaScZrO<sub>x</sub>.

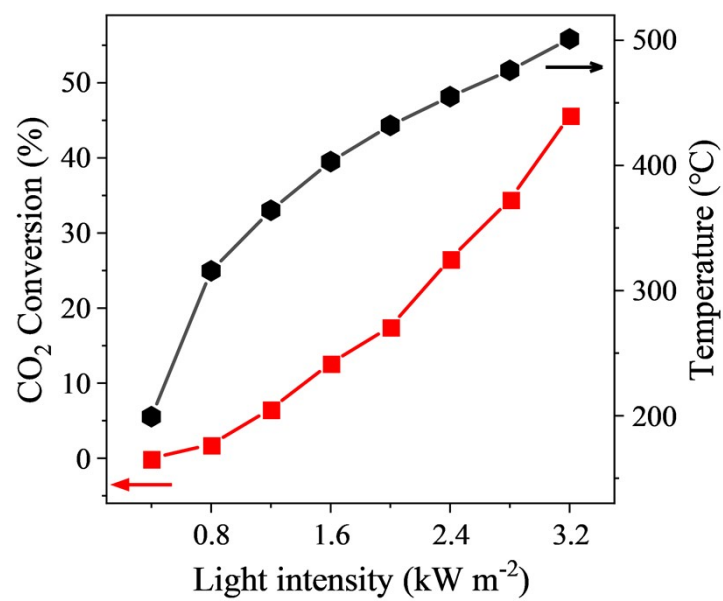

**Fig. S16** CO<sub>2</sub> conversion rate of photothermal RWGS for Pt@CeYLaScZrO<sub>x</sub>.

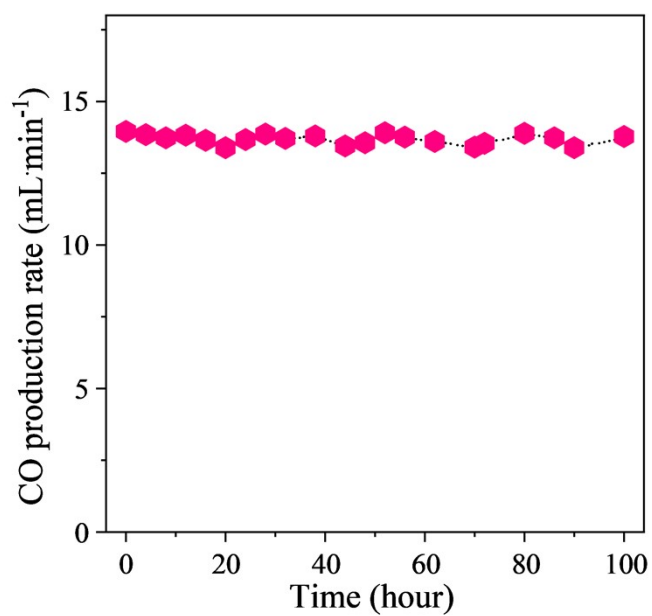

**Fig. S17** CO production of photothermal RWGS for Pt@CeYLaScZrO<sub>x</sub> under 3.2 kW m<sup>-2</sup> intensity of sunlight irradiation for 100 hours.



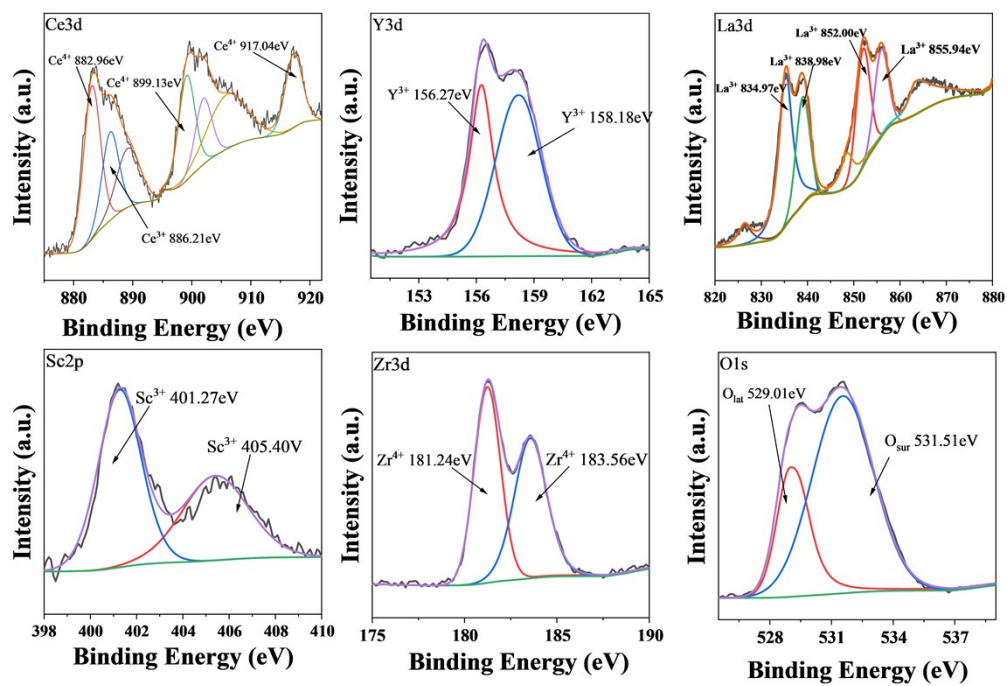

**Fig. S18** Ce3d, Y3d, La3d, Sc2p, Zr3d, O1s XPS spectra of A-Pt@CeYLaScZrO<sub>x</sub>.

## References

1. B. Ravel and M. Newville, ARTEMIS, HEPHAESTUS: data analysis for X-ray absorption spectroscopy using IFEFFIT, *J. Synchrotron Radiat.*, 2005, **12**, 537-541.
2. G. Kresse and J. Furthmüller, Efficiency of ab-initio total energy calculations for metals and semiconductors using a plane-wave basis set, *Comput. Mater. Sci.*, 1996, **6**, 15-50.
3. G. Kresse and J. Furthmüller, Efficient iterative schemes for ab initio total-energy calculations using a plane-wave basis set, *Phys. Rev. B*, 1996, **54**, 11169-11186.
4. J. P. Perdew, K. Burke and M. Ernzerhof, Generalized Gradient Approximation Made Simple, *Phys. Rev. Lett.*, 1996, **77**, 3865-3868.
5. G. Kresse and D. Joubert, From ultrasoft pseudopotentials to the projector augmented-wave method, *Phys. Rev. B*, 1999, **59**, 1758-1775.
6. P. E. Blöchl, Projector augmented-wave method, *Phys. Rev. B*, 1994, **50**, 17953-17979.
7. S. Grimme, J. Antony, S. Ehrlich and H. Krieg, A consistent and accurate ab initio parametrization of density functional dispersion correction (DFT-D) for the 94 elements H-Pu, *J. Chem. Phys.*, 2010, **132**, 154104.
8. Y. Li, F. Meng, Q. Wu, D. Yuan, H. Wang, B. Liu, J. Wang, X. San, L. Gu and Q. Meng, A Ni-O-Ag photothermal catalyst enables 103-m<sup>2</sup> artificial photosynthesis with > 17% solar-to-chemical energy conversion efficiency, *Sci. Adv.*, 2024, **10**, eadn5098.
9. M. Cai, Z. Wu, Z. Li, L. Wang, W. Sun, A. A. Tountas, C. Li, S. Wang, K. Feng, A.-B. Xu, S. Tang, A. Tavasoli, M. Peng, W. Liu, A. S. Helmy, L. He, G. A. Ozin and X. Zhang, Greenhouse-inspired supra-photothermal CO<sub>2</sub> catalysis, *Nat. Energy*, 2021, **6**, 807-814.
10. Q. Wu, J. Wang, D. Yuan, Y. Wang, Y. Li, Y. Guo, Z. Zhang, X. San, L. Zhang and J. Ye, Ambient Sunlight Driven Photothermal Green Syngas Production at 100 m<sup>3</sup> Scale by the Dynamic Structural Reconstruction of Iron Oxides with 38.7% Efficiency, *Adv. Funct. Mater.*, 2025, **35**, 2412562.
11. G. Chen, R. Gao, Y. Zhao, Z. Li, G. I. N. Waterhouse, R. Shi, J. Zhao, M. Zhang, L. Shang, G. Sheng, X. Zhang, X. Wen, L. Z. Wu, C. H. Tung and T. Zhang, Alumina-Supported CoFe Alloy Catalysts Derived from Layered-Double-Hydroxide Nanosheets for Efficient Photothermal CO<sub>2</sub> Hydrogenation to Hydrocarbons, *Adv. Mater.*, 2018, **30**, 1704663.
12. Z. Wu, J. Shen, C. Li, C. Zhang, K. Feng, Z. Wang, X. Wang, D. M. Meira, M. Cai and D. Zhang, Mo<sub>2</sub>TiC<sub>2</sub> MXene-supported Ru clusters for efficient photothermal reverse water–gas shift, *ACS Nano*, 2022, **17**, 1550-1559.
13. X. Meng, T. Wang, L. Liu, S. Ouyang, P. Li, H. Hu, T. Kako, H. Iwai, A. Tanaka and J. Ye, Photothermal Conversion of CO<sub>2</sub> into CH<sub>4</sub> with H<sub>2</sub> over Group VIII Nanocatalysts: An Alternative Approach for Solar Fuel Production, *Angew. Chem., Int. Ed.*, 2014, **53**, 11478-11482.
14. J. Jia, P. G. O'Brien, L. He, Q. Qiao, T. Fei, L. M. Reyes, T. E. Burrow, Y. Dong, K. Liao, M. Varela, S. J. Pennycook, M. Hmadeh, A. S. Helmy, N. P. Kherani, D. D. Perovic and G. A. Ozin, Visible and Near-Infrared Photothermal Catalyzed Hydrogenation of Gaseous CO<sub>2</sub> over Nanostructured Pd@Nb<sub>2</sub>O<sub>5</sub>, *Sci. Adv.*, 2016, **3**, 1600189.
15. T. Yan, L. Wang, Y. Liang, M. Makaremi, T. E. Wood, Y. Dai, B. Huang, F. M. Ali, Y. Dong and G. A. Ozin, Polymorph selection towards photocatalytic gaseous CO<sub>2</sub> hydrogenation, *Nat. Commun.*, 2019, **10**, 2521.
16. Y. Li, X. Bai, D. Yuan, C. Yu, X. San, Y. Guo, L. Zhang and J. Ye, Cu-based high-entropy two-dimensional oxide as stable and active photothermal catalyst, *Nat. Commun.*, 2023, **14**, 3171.

17. K. Feng, S. Wang, D. Zhang, L. Wang, Y. Yu, K. Feng, Z. Li, Z. Zhu, C. Li, M. Cai, Z. Wu, N. Kong, B. Yan, J. Zhong, X. Zhang, G. A. Ozin and L. He, Cobalt Plasmonic Superstructures Enable Almost 100% Broadband Photon Efficient CO<sub>2</sub> Photocatalysis, *Adv. Mater.*, 2020, **32**, 2000014.
18. X. Kang, D. Yuan, Z. Yi, C. Yu, X. Yuan, B. Liang, X. San, L. Gao, S. Wang and Y. Li, Bismuth single atom supported CeO<sub>2</sub> nanosheets for oxidation resistant photothermal reverse water gas shift reaction, *Catal. Sci. Technol.*, 2022, **12**, 5559-5564.
19. L. Wang, Y. Dong, T. Yan, Z. Hu, F. M. Ali, D. M. Meira, P. N. Duchesne, J. Y. Y. Loh, C. Qiu, E. E. Storey, Y. Xu, W. Sun, M. Ghoussoub, N. P. Kherani, A. S. Helmy and G. A. Ozin, Black indium oxide a photothermal CO<sub>2</sub> hydrogenation catalyst, *Nat. Commun.*, 2020, **11**, 2432.
20. Y.-F. Xu, P. N. Duchesne, L. Wang, A. Tavasoli, F. M. Ali, M. Xia, J.-F. Liao, D.-B. Kuang and G. A. Ozin, High-performance light-driven heterogeneous CO<sub>2</sub> catalysis with near-unity selectivity on metal phosphides, *Nat. Commun.*, 2020, **11**, 5149.
21. Y. Li, M. Wen, Y. Wang, G. Tian, C. Wang and J. Zhao, Plasmonic Hot Electrons from Oxygen Vacancies for Infrared Light-Driven Catalytic CO<sub>2</sub> Reduction on Bi<sub>2</sub>O<sub>3-x</sub>, *Angew. Chem.*, 2021, **133**, 923-929.
22. D. Lou, Z. Zhu, Y.-F. Xu, C. Li, K. Feng, D. Zhang, K. Lv, Z. Wu, C. Zhang and G. A. Ozin, A core-shell catalyst design boosts the performance of photothermal reverse water gas shift catalysis, *Sci. China Mater.*, 2021, **64**, 2212-2220.
23. L. B. Hoch, P. G. O'Brien, F. M. Ali, A. Sandhel, D. D. Perovic, C. A. Mims and G. A. Ozin, Nanostructured indium oxide coated silicon nanowire arrays: a hybrid photothermal/photochemical approach to solar fuels, *Acs Nano*, 2016, **10**, 9017-9025.
24. L. He, T. Wood, B. Wu, Y. Dong, L. Hoch, L. Reyes, D. Wang, C. Kübel, C. Qian and J. Jia, Spatial separation of charge carriers in In<sub>2</sub>O<sub>3-x</sub>(OH)<sub>y</sub> nanocrystal superstructures for enhanced gas-phase photocatalytic activity, *Acs Nano*, 2016, **10**, 5578-5586.
